1 **Multiple T6SSs, mobile auxiliary modules, and effectors revealed in a systematic**  
2 **analysis of the *Vibrio parahaemolyticus* pan-genome**

3 Biswanath Jana<sup>1</sup>, Kinga Keppel<sup>1</sup>, Chaya Mushka Fridman<sup>1</sup>, Eran Bosis<sup>2,#</sup>, & Dor Salomon<sup>1,#</sup>

4

5 <sup>1</sup> Department of Clinical Microbiology and Immunology, Sackler Faculty of Medicine, Tel Aviv  
6 University, Tel Aviv, Israel

7 <sup>2</sup> Department of Biotechnology Engineering, Braude College of Engineering, Karmiel, Israel

8 # Corresponding authors. Tel: +972 3 6408583; E-mail: [dorsalomon@mail.tau.ac.il](mailto:dorsalomon@mail.tau.ac.il) (DS); Tel:  
9 +972 4 9901927; E-mail: [boasis@braude.ac.il](mailto:boasis@braude.ac.il) (EB)

10

11 **Running title:** Pan-genome repertoire of *Vibrio parahaemolyticus* T6SS

12 **Key words:** T6SS, antibacterial, competition, secretion, Vibrio

13

14 **Abstract**

15 Type VI secretion systems (T6SSs) play a major role in interbacterial competition and in bacterial  
16 interactions with eukaryotic cells. The distribution of T6SSs and the effectors they secrete vary  
17 between strains of the same bacterial species. Therefore, a pan-genome investigation is required  
18 to better understand the T6SS potential of a bacterial species of interest. Here, we performed a  
19 comprehensive, systematic analysis of T6SS gene clusters and auxiliary modules found in the  
20 pan-genome of *Vibrio parahaemolyticus*, an emerging pathogen widespread in marine  
21 environments. We identified four different T6SS gene clusters within genomes of this species; two  
22 systems appear to be ancient and widespread, whereas the other two systems are rare and  
23 appear to have been more recently acquired via horizontal gene transfer. In addition, we identified  
24 diverse T6SS auxiliary modules containing putative effectors with either known or predicted toxin  
25 domains. Many auxiliary modules are possibly horizontally shared between *V. parahaemolyticus*  
26 genomes, since they are flanked by DNA mobility genes. We further investigated a DUF4225-  
27 containing protein encoded on an Hcp auxiliary module, and we showed that it is an antibacterial  
28 T6SS effector that exerts its toxicity in the bacterial periplasm, leading to cell lysis. Computational  
29 analyses of DUF4225 revealed a widespread toxin domain associated with various toxin delivery  
30 systems. Taken together, our findings reveal a diverse repertoire of T6SSs and auxiliary modules  
31 in the *V. parahaemolyticus* pan-genome, as well as novel T6SS effectors and toxin domains that  
32 can play a major role in the interactions of this species with other cells.

33

34 **Importance**

35 Gram-negative bacteria employ toxin delivery systems to mediate their interactions with  
36 neighboring cells. *Vibrio parahaemolyticus*, an emerging pathogen of humans and marine  
37 animals, was shown to deploy antibacterial toxins into competing bacteria via the type VI secretion  
38 system (T6SS). Here, we analyzed 1,727 *V. parahaemolyticus* genomes and revealed the pan-  
39 genome T6SS repertoire of this species, including the T6SS gene clusters, horizontally shared  
40 auxiliary modules, and toxins. We also identified a role for a previously uncharacterized domain,  
41 DUF4225, as a widespread antibacterial toxin associated with diverse toxin delivery systems.

42

## 43 Introduction

44 During competition, bacteria deliver toxic cocktails of effectors using specialized, contact-  
45 dependent protein secretion systems (1). Gram-negative bacteria often employ the type VI  
46 secretion system (T6SS) to gain a competitive advantage over their rivals (2). This system  
47 comprises 13-14 core components, in addition to accessory components that differ between  
48 systems and may play different regulatory roles (3–6). The structural and regulatory components  
49 of T6SS are encoded within large gene clusters that also often encode effectors; effectors are  
50 also encoded within auxiliary modules containing T6SS core components (7–10), or within orphan  
51 cassettes (11, 12). The effectors are loaded onto a missile-like structure comprising a tube  
52 consisting of stacked rings of Hcp hexamers; the tube is capped by a spike complex composed  
53 of a VgrG trimer sharpened by a PAAR repeat-containing protein (hereafter referred to as PAAR)  
54 (13). The loaded missile is propelled outside of the cell by a contracting sheath that engulfs it (14);  
55 the contraction provides sufficient force to penetrate into a neighboring cell and deploy the  
56 effectors (5).

57 Many effector families that contain toxin domains that mediate antibacterial activities have been  
58 reported. Effectors often target conserved bacterial components in the cytoplasm or periplasm,  
59 such as nucleic acids (nucleases) (7, 15–19), the membrane (phospholipases and pore-forming  
60 toxins) (10, 11, 20–22), or the peptidoglycan layer (amidases, glycoside hydrolases, and carboxy-  
61 and transpeptidases) (12, 23, 24). Additional activities mediated by T6SS effectors include the  
62 following: altering the energy balance by hydrolyzing NAD(P)<sup>+</sup> (25, 26), ADP-ribosylating the  
63 conserved protein FtsZ to inhibit cell division (27), ADP-ribosylating the 23S rRNA to inhibit  
64 translation (28), targeting the transamidosome to inhibit protein synthesis (29), deaminating the  
65 target cell's DNA (30), and synthesizing the toxic molecule (p)ppApp (31). Antibacterial T6SS  
66 effectors are encoded adjacent to cognate immunity proteins that protect against self- or kin-  
67 intoxication (2, 32). Several experimental and computational approaches have been used to  
68 identify effector and immunity (E/I) pairs (2, 7, 11, 12, 29, 33–36). Nevertheless, because T6SS  
69 effectors employ diverse mechanisms for secretion (13, 37–39), and therefore lack a canonical  
70 secretion signal, it is estimated that many more effectors still await discovery.

71 *Vibrio parahaemolyticus* is an emerging pathogen that inhabits marine and estuarine  
72 environments (40). Previous works revealed that all investigated *V. parahaemolyticus* isolates  
73 contain a T6SS on chromosome 2, named T6SS2, whereas pathogenic isolates encode another  
74 T6SS on chromosome 1, named T6SS1 (41–43). The presence of additional T6SSs in this  
75 species remains to be investigated. T6SS2 was recently shown to mediate antibacterial activities;  
76 however, its effector repertoire remains unstudied (11, 44). T6SS1, which has been studied in  
77 several isolates (7, 11, 36, 42, 43), also mediates antibacterial activities. Each isolate contains  
78 conserved antibacterial E/I pairs, which are encoded by the main T6SS1 gene cluster, as well as  
79 “accessory” E/I pairs that differ between isolates and diversify the effector repertoire (36, 45). To  
80 date, accessory T6SS1 E/I pairs were found in auxiliary T6SS modules containing a gene  
81 encoding VgrG (7), or as orphan operons that often reside next to DNA mobility elements (11, 36,  
82 42). Notably, since most vibrios are naturally competent (46, 47), horizontal gene transfer (HGT)  
83 may play a role in the acquisition and evolution of the T6SS E/I pair repertoire (48, 49).

84 In this study, we sought to reveal the collective repertoire of T6SS gene clusters and auxiliary  
85 modules in *V. parahaemolyticus*, as well as to identify new effectors. By systematically analyzing  
86 1,727 *V. parahaemolyticus* genomes, we identified four types of T6SS gene clusters and many  
87 distinct, widespread auxiliary modules predicted to encode diverse effectors; the vast majority of  
88 the auxiliary modules, as well as two of the T6SS gene clusters, are found next to DNA mobility  
89 genes, suggesting that they were acquired via HGT. Intriguingly, most *hcp*-containing auxiliary  
90 modules encode a previously undescribed effector with a C-terminal domain of unknown function

91 4225 (DUF4225). We experimentally showed that this effector is toxic upon delivery to the  
92 bacterial periplasm, where it leads to cell lysis. We also identified a downstream-encoded cognate  
93 immunity protein that antagonizes the effector's toxic effect. Surprisingly, although several strains  
94 of marine bacteria were intoxicated by this effector during competition, others, including two *V.*  
95 *parahaemolyticus* strains that do not contain homologs of the cognate immunity protein, were  
96 resistant to the attack. Further analysis revealed that DUF4225 is a widespread toxin domain that  
97 is present in polymorphic toxins associated with several protein secretion systems.

98

## 99 **Results**

### 100 **Four T6SS gene clusters are found in the *V. parahaemolyticus* pan-genome**

101 We first set out to identify the T6SS gene clusters found in the *V. parahaemolyticus* pan-genome.  
102 To this end, we retrieved the sequences of the conserved T6SS core component, TssB (3), from  
103 1,727 available RefSeq *V. parahaemolyticus* genomes ([Supplementary Dataset S1](#)). Analysis  
104 of the phylogenetic distribution of TssB revealed four groups ([Fig. 1A](#)) corresponding to four  
105 distinct T6SS gene clusters in *V. parahaemolyticus* genomes ([Fig. 1B](#) and [Supplementary](#)  
106 [Dataset S2,S3](#)).

107 T6SS1 and T6SS2 were previously investigated and found to mediate interbacterial competition  
108 (7, 11, 36, 43, 44). In agreement with previous analyses on smaller genome datasets (7, 11, 43),  
109 we identified T6SS2 in nearly all *V. parahaemolyticus* genomes (99%), whereas T6SS1 was  
110 identified in 68.3% of the genomes ([Fig. 1b](#), [Fig. 2](#), and [Supplementary Dataset S2,S3](#)). We did  
111 not identify known or potential effectors encoded within the T6SS2 gene clusters; however, the  
112 T6SS1 clusters contain two antibacterial effectors, corresponding to VP1390 and VP1415 in the  
113 type strain RIMD 2210633 (36, 37) ([Table 1](#)). Interestingly, we observed some diversity at the  
114 end of T6SS1 gene clusters; we found what appears to be duplications (between one and six  
115 copies) of the PAAR-containing specialized effector, corresponding to VP1415 in the type strain  
116 RIMD 2210633 (36).

117 Two additional T6SS gene clusters, which we named T6SS3 and T6SS4 ([Fig. 1b](#)), have a limited  
118 distribution in *V. parahaemolyticus* genomes (0.8% and 1.8%, respectively) ([Fig. 2](#), and  
119 [Supplementary Dataset S2,S3](#)). T6SS3 is similar to the previously reported T6SS3 of *V.*  
120 *proteolyticus*, which was suggested to have anti-eukaryotic activity (50). T6SS4 could be further  
121 divided into three sub-groups, a-c, with minor differences in gene sequence and content ([Fig. 1b](#)  
122 and [Supplementary Dataset S3](#)). We identified potential effectors encoded in both the T6SS3  
123 and T6SS4 gene clusters ([Fig. 1b](#) and [Table 1](#)). Notably, T6SS3 and T6SS4, which were not  
124 previously described in *V. parahaemolyticus*, are flanked by transposases and other DNA mobility  
125 elements ([Fig. 1](#)), suggesting that they have been acquired via HGT. Taken together, these  
126 results reveal that the *V. parahaemolyticus* pan-genome contains two widespread T6SSs and two  
127 T6SSs with limited distribution.

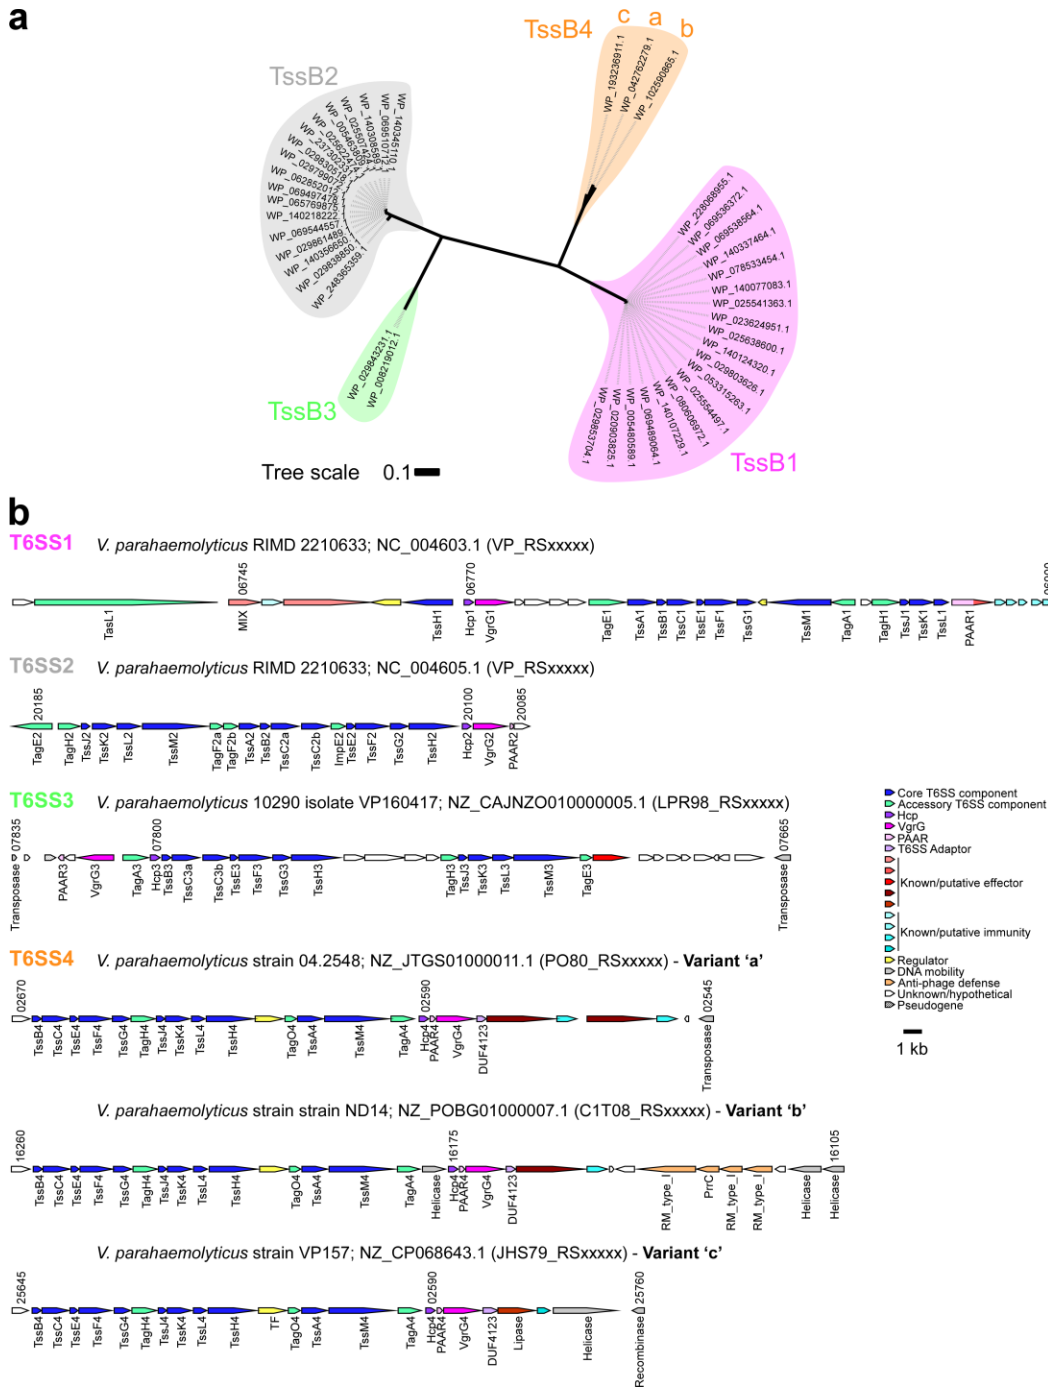

**Figure 1. The *V. parahaemolyticus* pan-genome harbors four T6SSs.** (a) Phylogenetic distribution of the T6SS core component TssB encoded within *V. parahaemolyticus* genomes. The evolutionary history was inferred using the neighbor-joining method. The phylogenetic tree was drawn to scale, with branch lengths in the same units as those of the evolutionary distances used to infer the phylogenetic tree. The evolutionary distances were computed using the Poisson correction method; they are in the units of the number of amino acid substitutions per site. (b) Representative T6SS gene clusters found in *V. parahaemolyticus* genomes. The strain names, the GenBank accession numbers, and the locus tag annotation patterns are provided. Genes are denoted by arrows indicating the direction of transcription. Locus tags are denoted above, and the names of encoded proteins or domains are denoted below.

## 129 Diverse and widespread T6SS auxiliary modules contain effectors

130 Although T6SS effectors are often encoded within the main T6SS gene clusters, auxiliary modules  
131 containing at least one secreted T6SS component (i.e., Hcp, VgrG, or PAAR) and downstream-  
132 encoded effectors are also common (7–10). Therefore, to identify auxiliary T6SS modules, we  
133 searched the *V. parahaemolyticus* pan-genome for Hcp, VgrG, and PAAR encoded outside the  
134 four main T6SS gene clusters described above. We found diverse auxiliary module types widely  
135 distributed among the different *V. parahaemolyticus* genomes (**Fig. 2, Supplementary Fig. S1,**  
136 **and Supplementary Dataset S2,S4**). These modules are predominantly found next to DNA  
137 mobility genes, such as integrases, recombinases, transposases, phage proteins, or plasmid  
138 mobility elements. Notably, some modules contain more than one secreted T6SS component,  
139 and some genomes harbor multiple module types (up to seven modules in one genome).

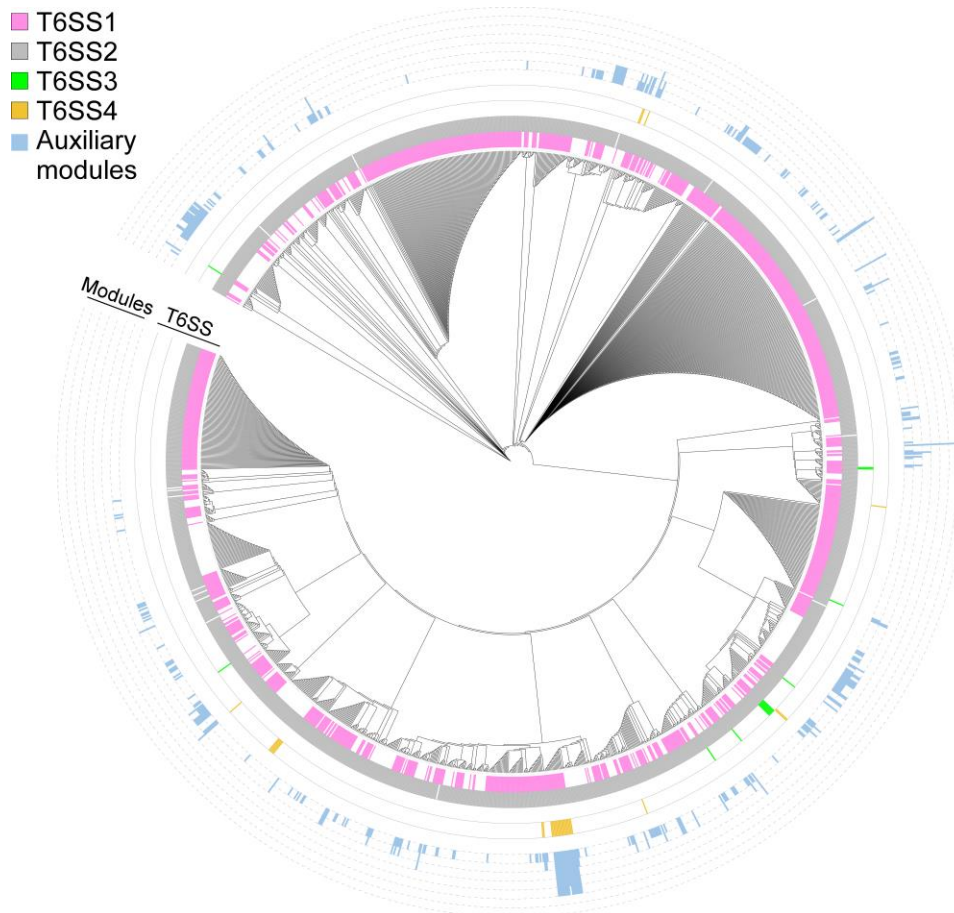

**Figure 2. Distribution of T6SS gene clusters and auxiliary modules in *V. parahaemolyticus*.** The phylogenetic tree was based on DNA sequences of *rpoB* coding for DNA-directed RNA polymerase subunit beta. The evolutionary history was inferred using the neighbor-joining method. The height of the blue bars denoted the number of T6SS auxiliary modules per genome.

140 PAAR proteins encoded within auxiliary modules are often specialized effectors containing known  
141 (e.g., AHH, Ntox15, and NUC nucleases) or predicted C-terminal toxin domains (**Table 1**),  
142 followed by a downstream gene that possibly encodes a cognate immunity protein  
143 (**Supplementary Fig. S1** and **Supplementary Dataset S4**). Homologous PAAR proteins are also  
144 encoded within similar auxiliary module configurations in which the toxin domain is encoded by a  
145 separate gene as a possible cargo effector (**Table 1** and **Supplementary Dataset S4**). In

146 contrast, we did not identify auxiliary VgrG proteins containing C-terminal toxin domains; instead,  
 147 auxiliary VgrG modules carry cargo effectors, some with known activities (e.g., PoNe DNase,  
 148 NucA/B nuclease, and Lip2 lipase). These cargo effectors are mostly encoded downstream of a  
 149 gene encoding a T6SS adaptor protein, such as DUF4123, DUF2169, and DUF1795 (39, 51)  
 150 (**Supplementary Fig. S1** and **Supplementary Dataset S4**).

151 Hcp-encoding auxiliary modules contain a few, previously uncharacterized, putative cargo  
 152 effectors of unknown function (**Table 1**, **Supplementary Fig. S1** and **Supplementary Dataset**  
 153 **S4**). Interestingly, in most Hcp-containing auxiliary modules that we found, which are located in  
 154 diverse synteny, a DUF4225-containing protein is encoded immediately downstream of *hcp*  
 155 (**Supplementary Fig. S2**). Some DUF4225-encoding genes have an adjacent, small gene  
 156 encoding a protein predicted to contain transmembrane helices (according to a Phobius server  
 157 analysis (52)) (**Supplementary Dataset S4**). Based on these findings, we hypothesized that  
 158 these DUF4225-encoding genes and their downstream adjacent genes are antibacterial T6SS E/I  
 159 pairs.

160

161 **Table 1. Predicted effectors in *V. parahaemolyticus* T6SS clusters and auxiliary modules.**

| Example accession number | Example gene locus  | Found in T6SS or module type | Effector type           | Predicted toxin domain | Predicted activity  | Homologs in other polymorphic toxin classes | Ref.      |
|--------------------------|---------------------|------------------------------|-------------------------|------------------------|---------------------|---------------------------------------------|-----------|
| WP_005480617.1           | VP_RS06755 (VP1390) | T6SS1                        | Cargo                   | Unknown                | Cell lysis          | No                                          | (37)      |
| WP_005493834.1           | VP_RS06875 (VP1415) | T6SS1, PAAR                  | Specialized / Cargo     | AHH                    | Nuclease            | Yes                                         | (36, 53)  |
| WP_029843206.1           | LPR98_RS07710       | T6SS3                        | Cargo                   | Unknown                | Unknown             | Yes                                         |           |
| WP_042762256.1           | PO80_RS02570        | T6SS4a,b                     | Cargo                   | Unknown                | Unknown             | No                                          |           |
| WP_193237005.1           | JHS79_RS25745       | T6SS4c, Hcp+VgrG             | Cargo                   | Lip2                   | Lipase              | Yes                                         |           |
| WP_065771704.1           | AKH09_RS09365       | PAAR+VgrG+Hcp                | Cargo                   | Unknown                | Unknown             | Yes                                         |           |
| WP_238790300.1           | K6U37_RS14065       | PAAR+VgrG                    | Cargo                   | NucA/B                 | Nuclease            | Yes                                         | (53)      |
| WP_020841305.1           | H9J98_RS02420       | PAAR                         | Specialized / Cargo     | Ntox15                 | Nuclease            | Yes                                         | (15, 53)  |
| WP_083135234.1           | GPY55_RS17385       | PAAR                         | Specialized / Cargo     | NUC                    | Nuclease            | Yes                                         | (53)      |
| WP_102591288.1           | C1T08_RS26340       | PAAR                         | Specialized             | Unknown                | Unknown             | Yes                                         |           |
| WP_102591220.1           | C1S85_RS24675       | PAAR                         | Specialized             | Tme                    | Membrane-disrupting | Yes                                         | (11)      |
| WP_102591225.1           | C1S85_RS24700       | PAAR                         | Specialized             | Unknown                | Unknown             | Yes                                         |           |
| WP_238789479.1           | K6U37_RS04455       | PAAR                         | Specialized (truncated) | Unknown                | Unknown             | Yes                                         |           |
| WP_129147717.1           | EGL73_RS17180       | VgrG                         | Cargo                   | Unknown                | Unknown             | No                                          | (54)      |
| WP_029857615.1           | B5C30_RS14465       | VgrG                         | Cargo                   | PoNe                   | DNase               | Yes                                         | (7)       |
| WP_238790289.1           | K6U37_RS13990       | VgrG                         | Cargo                   | Unknown                | Unknown             | Yes                                         | (45)      |
| WP_086585359.1           | JHS88_RS14235       | Hcp                          | Cargo                   | DUF4225                | Cell lysis          | Yes                                         | This work |
| WP_195433156.1           | K6U37_RS12660       | Hcp                          | Cargo                   | Unknown                | Unknown             | Yes                                         |           |
| WP_228085946.1           | IB292_RS21975       | Hcp                          | Cargo                   | Unknown                | Unknown             | Yes                                         |           |

162

### 163 Constructing an “effectorless” surrogate T6SS platform

164 A surrogate T6SS platform can be used as a tool to study putative E/I pairs. The major advantage  
 165 of the surrogate platform is that it only requires constructing a single plasmid to express the  
 166 putative E/I pair in question (11). Since we have previously reported that the T6SS1 of POR1, a  
 167 *V. parahaemolyticus* strain RIMD 2210633 derivative, can be used as a surrogate platform to  
 168 deliver and investigate effectors and modules belonging to T6SS1 from other *V. parahaemolyticus*

169 strains (11), we decided to employ this strategy to investigate the putative DUF4225-containing  
170 effector.

171 A drawback of our previously reported surrogate platform was the presence of the endogenous  
172 T6SS1 effectors of the RIMD 2210633 strain (36), which prevented the use of a possibly sensitive  
173 prey strain and thus required the use of a RIMD 2210633-derived strain containing the cognate  
174 immunity proteins as prey during competition assays. To enable the use of a surrogate platform  
175 during competition against diverse prey strains, we set out to construct an “effectorless” version.  
176 To this end, we deleted the genes encoding the reported effector VPA1263 (36) and the co-  
177 effector VP1388 (37), and we replaced two residues in the predicted active site of the specialized  
178 effector VP1415 (36) with alanine, as previously reported (55). In addition, we deleted *vp1133*,  
179 which encodes an H-NS protein that represses T6SS1 activity in *V. parahaemolyticus* (56), to  
180 constitutively activate T6SS1 in the surrogate strain. The resulting platform, which we named  
181 VpT6SS1<sup>Surrogate</sup>, is active at 30°C in media containing 3% (wt/vol) NaCl, as evident by the  
182 expression and secretion of the hallmark VgrG1 protein in a T6SS1-dependent manner  
183 (**Supplementary Fig. S3A**). Furthermore, VpT6SS1<sup>Surrogate</sup> enables interbacterial killing of  
184 susceptible *V. natriegens* prey during competition mediated by a plasmid-borne VgrG1b auxiliary  
185 module belonging to T6SS1 of *V. parahaemolyticus* strain 12-297/B, containing the PoNe DNase  
186 effector (7) (**Supplementary Fig. S3B**).

187

## 188 **A DUF4225-containing protein is a T6SS1 antibacterial effector**

189 To determine whether DUF4225-encoding genes and their adjacent downstream genes are  
190 antibacterial T6SS E/I pairs, we chose to investigate an Hcp auxiliary module from *V.*  
191 *parahaemolyticus* strain CFSAN018764 (**Supplementary Fig. S2**; RefSeq sequence  
192 NZ\_LHBG01000025.1) encoding an Hcp and a DUF4225-containing protein, hereafter referred  
193 to as DUF4225<sup>18764</sup> (accession numbers WP\_065788327.1 and WP\_065788326.1, respectively).  
194 This strain harbors both T6SS1 and T6SS2 (**Supplementary Dataset S2**). Since the module’s  
195 Hcp is more similar to Hcp1 than to Hcp2 (**Supplementary Fig. S4** and **Supplementary Dataset**  
196 **S5**), we reasoned that this Hcp auxiliary module is probably associated with T6SS1; we therefore  
197 named this Hcp as Hcp1b.

198 The Hcp1b module lacked an annotated gene immediately downstream of the gene encoding the  
199 putative effector DUF4225<sup>18764</sup>. Nevertheless, when we performed a manual analysis of the  
200 nucleotide sequence, we identified an open reading frame immediately downstream of the  
201 putative effector (positions 296 to 27 in NZ\_LHBG01000025.1) (**Supplementary Fig. S2**). The  
202 identified gene encodes an 89 amino acid-long protein containing three predicted transmembrane  
203 helices. Therefore, we predicted that this gene encodes a cognate DUF4225<sup>18764</sup> immunity  
204 protein, and we named it Imm4225<sup>18764</sup>.

205 Using VpT6SS1<sup>Surrogate</sup>, we next set out to investigate the ability of the Hcp1b auxiliary module  
206 from strain CFSAN018764 to mediate T6SS1-dependent competition. As shown in **Figure 3**, an  
207 arabinose-inducible plasmid encoding the three proteins of the Hcp1b module (pModule; i.e.,  
208 Hcp1b, DUF4225<sup>18764</sup>, and Imm4225<sup>18764</sup>), but not Hcp1b alone (pHcp1b), mediated the T6SS1-  
209 dependent intoxication of *V. natriegens* prey. Expression of Imm4225<sup>18764</sup> from a plasmid (pImm)  
210 rescued the *V. natriegens* prey strain from this attack. Taken together, these results indicate that  
211 the Hcp1b auxiliary module of *V. parahaemolyticus* strain CFSAN018764 carries a T6SS1  
212 antibacterial E/I pair.

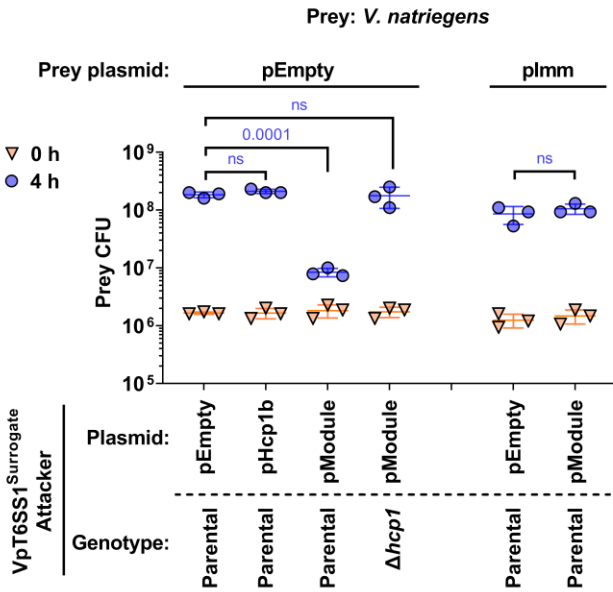

**Figure 3. A DUF4225-containing Hcp auxiliary module contains a T6SS1 effector and immunity pair.** Viability counts (CFU) of *V. natriegens* prey strains containing an empty plasmid (pEmpty) or a plasmid for the arabinose-inducible expression of Imm4225<sup>18764</sup> (plmm) before (0 h) and after (4 h) co-incubation with the surrogate T6SS1 platform strain (VpT6SS1<sup>Surrogate</sup>) or its T6SS1-derivative ( $\Delta$ hcp1) carrying an empty plasmid (pEmpty) or a plasmid for the arabinose-inducible expression of Hcp1b (pHcp1b) or the three-gene Hcp1b module (pModule) from *V. parahaemolyticus* strain CFSAN018764. The statistical significance between samples at the 4 h timepoint was calculated using an unpaired, two-tailed Student's *t*-test; ns, no significant difference ( $p > 0.05$ ). Data are shown as the mean  $\pm$  SD;  $n = 3$ .

213

### 214 A DUF4225-containing effector leads to cell lysis upon delivery to the periplasm

215 Next, we investigated the toxicity mediated by DUF4225<sup>18764</sup>. The arabinose-inducible expression  
 216 of the effector in the periplasm of *E. coli* (by fusion to an N-terminal PelB signal peptide), but not  
 217 in the cytoplasm, led to a clear reduction in the optical density (OD<sub>600</sub>) of the bacterial culture over  
 218 time (**Fig. 4A**); the phenotype was similar to the lytic effect of the amidase effector Tse1 from  
 219 *Pseudomonas aeruginosa* (57), and dissimilar to the effect of the membrane-disrupting effector  
 220 Tme1 from *V. parahaemolyticus* (11). Lysis was also observed when *E. coli* cells expressing the  
 221 periplasmic version of DUF4225<sup>18764</sup> were visualized under a fluorescence microscope.  
 222 Approximately 90 minutes after inducing DUF4225<sup>18764</sup> expression, cells began to shrink and  
 223 appeared to have lost their cytoplasmic content. Concomitantly, the leakage of DNA from these  
 224 cells became apparent, manifesting as the fluorescence of propidium iodide (PI), a non-  
 225 permeable DNA dye that was added to the media, around them (**Fig. 4B** and **Supplementary**  
 226 **Movie S1**). These phenotypes are characteristic of cell lysis (58). Sometimes, mostly at later  
 227 stages of the time course, we observed cells stained from the inside by PI, indicative of the slow  
 228 permeabilization of the membranes. Similar phenotypes were not seen in *E. coli* cells containing  
 229 an empty expression plasmid (**Supplementary Fig. S5** and **Supplementary Movie S1**). Taken  
 230 together, our results suggest that the activity of DUF4225<sup>18764</sup> in the bacterial periplasm can lead  
 231 to cell lysis. Importantly, the co-expression of Imm4225<sup>18764</sup> in *E. coli* rescued the cells from the  
 232 toxicity mediated by periplasmic DUF4225<sup>18764</sup> (**Fig. 4C**), further supporting its role as the cognate  
 233 immunity protein of this effector. The expression of the non-toxic cytoplasmic version of  
 234 DUF4225<sup>18764</sup> was detected in immunoblots, whereas the toxic periplasmic version of  
 235 DUF4225<sup>18764</sup> was only detected when Imm4225<sup>18764</sup> was co-expressed (**Supplementary Fig.**  
 236 **S6**).



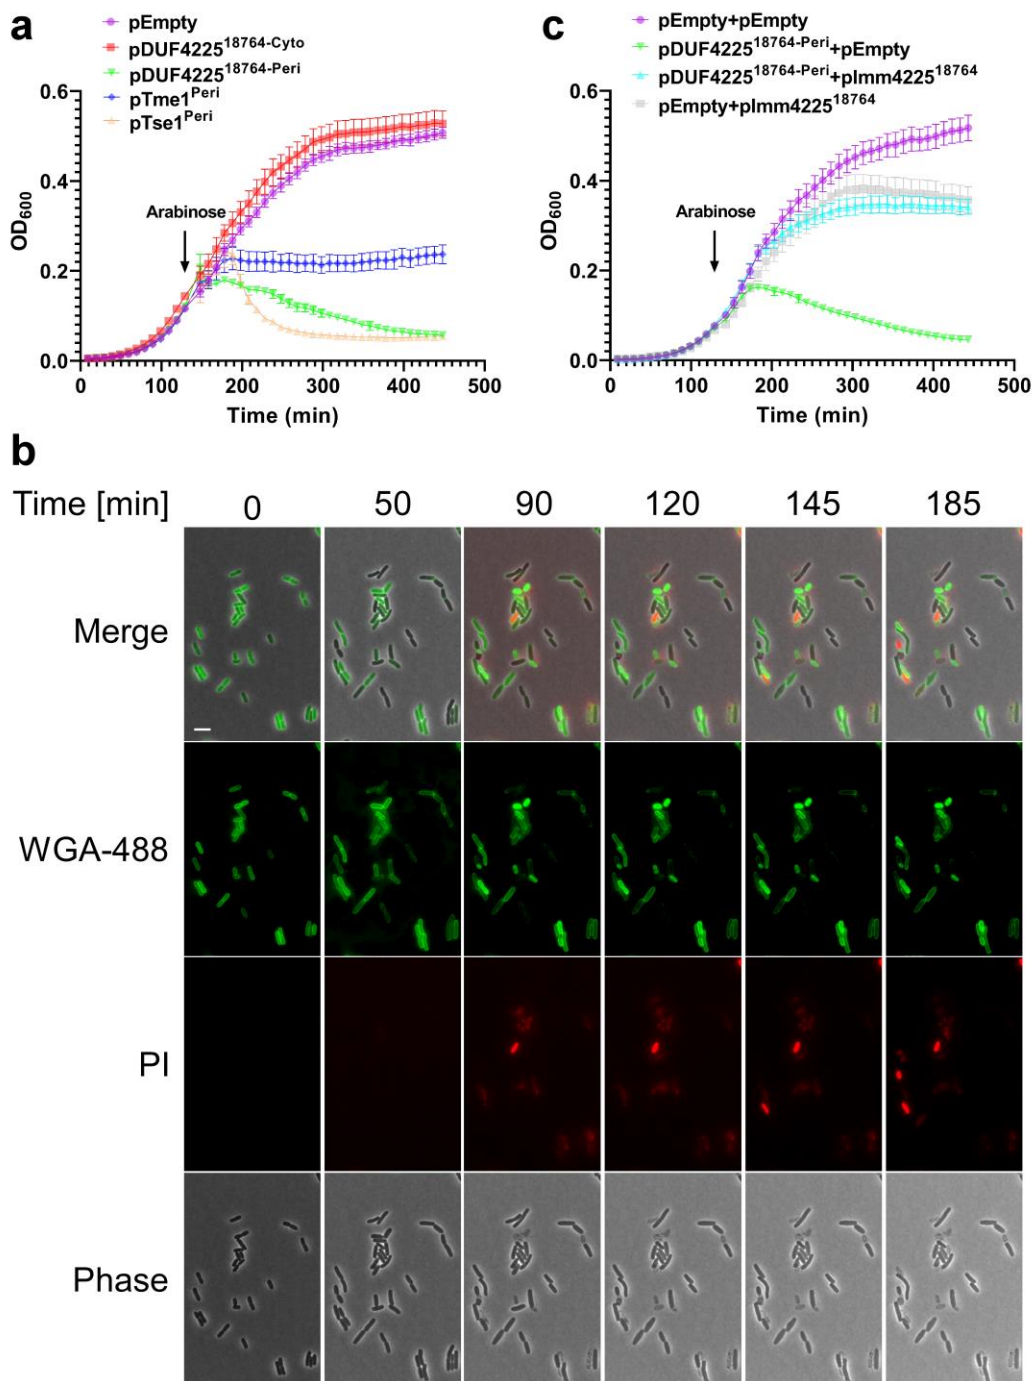

**Figure 4. DUF4225<sup>18764</sup> induces cell lysis upon delivery to the periplasm.** (a,c) Growth of *E. coli* BL21 (DE3) containing arabinose-inducible plasmids, either empty (pEmpty) or expressing the indicated proteins in the cytoplasm (Cyto) or periplasm (Peri; fused to an N-terminal PelB signal peptide). In 'c', bacteria contain a second plasmid, either empty (pEmpty) or encoding Imm4225<sup>18764</sup>. An arrow denotes the timepoint at which arabinose (0.05%) was added to the media. (b) Time-lapse microscopy of *E. coli* MG1655 cells stained with Wheat Germ Agglutinin Alexa Fluor 488 conjugate (WGA-488) and that express a periplasmic DUF4225<sup>18764</sup> from an arabinose-inducible plasmid, grown on agarose pads supplemented with chloramphenicol (to maintain the plasmid) and 0.2% arabinose (to induce expression), and propidium iodide (PI). WGA-488 (green), PI (red), phase contrast and merged channels are shown. Size bar = 5  $\mu$ m.

## 238 ***Vibrio* strains without a cognate immunity protein can resist DUF4225<sup>18764</sup> toxicity**

239 We and others previously reported that certain T6SS effectors appear to have a specific toxicity  
 240 range; they can intoxicate some but not all bacterial prey strains during T6SS-mediated attacks  
 241 (55, 59). Since some resistant strains do not carry a homolog of the intoxicating effector's cognate  
 242 immunity protein, it had been suggested that non-immunity protein-mediated defense  
 243 mechanisms play a role in such resistance (60). In light of these recent observations, we set out  
 244 to examine the toxicity range of a T6SS attack mediated by DUF4225<sup>18764</sup>. To this end, we  
 245 monitored the viability of several marine bacteria prey strains during competition against the  
 246 VpT6SS1<sup>Surrogate</sup> platform delivering DUF4225<sup>18764</sup>. For prey strains with antibacterial T6SSs  
 247 known or predicted to be active under the tested conditions, we used mutants in which the T6SS  
 248 was inactivated by deleting a T6SS core component (e.g., *hcp* or *tssB*), as indicated, to avoid  
 249 counterattacks during competition. Interestingly, whereas *V. campbellii* ATCC 25920, *V.*  
 250 *coralliilyticus* ATCC BAA-450, and *Aeromonas jandaei* DSM 7311 were susceptible to a  
 251 DUF4225<sup>18764</sup>-mediated attack, *V. parahaemolyticus* 12-297/B was only mildly susceptible to the  
 252 attack and *V. vulnificus* CMCP6 and *V. parahaemolyticus* RIMD 2210633 were not affected by it  
 253 (Fig. 5). The three latter strains do not carry a homolog of Imm4225<sup>18764</sup>. Importantly, all prey  
 254 strains except for *V. parahaemolyticus* 12-297/B and *Aeromonas jandaei* DSM 7311, which  
 255 contain a PoNi immunity protein, were susceptible to intoxication by a PoNe DNase effector from  
 256 *V. parahaemolyticus* strain 12-297/B (7), when it was delivered by the VpT6SS1<sup>Surrogate</sup> platform  
 257 (Fig. 5); this result indicates that the platform can deliver effectors into the tested prey strains.  
 258 Therefore, our results reveal that certain bacteria can resist intoxication by DUF4225<sup>18764</sup> even in  
 259 the absence of a cognate immunity protein.

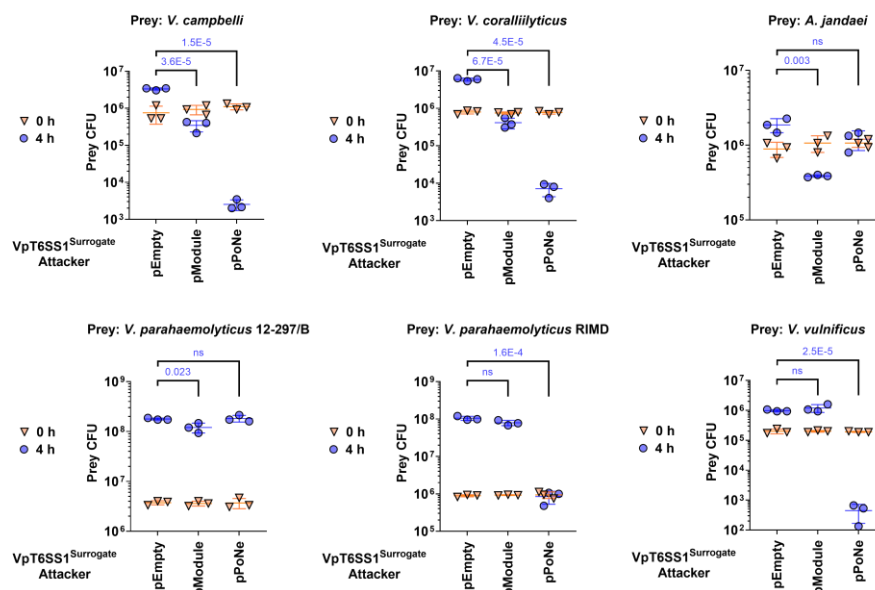

**Figure 5. Varying sensitivity of marine bacteria to DUF4225<sup>18764</sup> T6SS-mediated attacks.** Viability counts (CFU) of the indicated prey strains before (0 h) and after (4 h) co-incubation with the surrogate T6SS1 platform strain (VpT6SS1<sup>Surrogate</sup>) carrying an empty plasmid (pEmpty) or a plasmid for the arabinose-inducible expression of the three-gene Hcp1b module (pModule) from *V. parahaemolyticus* strain CFSAN018764 or the PoNe DNase-containing VgrG1b module from *V. parahaemolyticus* 12-297/B (pPoNe). Statistical significance between samples at the 4 h timepoint was calculated using an unpaired, two-tailed Student's *t*-test; ns, no significant difference ( $P > 0.05$ ). Data are shown as the mean  $\pm$  SD; n=3. The prey strains used were *V. campbellii* ATCC 25920  $\Delta$ *hcp1*, *V. coralliilyticus* ATCC BAA-450  $\Delta$ *hcp1*, *Aeromonas jandaei* DSM 7311  $\Delta$ *tssB*, *V. parahaemolyticus* 12-297/B  $\Delta$ *hcp1*, *V. parahaemolyticus* RIMD 2210633  $\Delta$ *hcp1*, and *V. vulnificus* CMCP6.

260

261 **DUF4225 is a widespread toxin domain associated with diverse secretion systems**

262 We next investigated the distribution of the DUF4225 toxin domain in bacterial genomes. We  
 263 found that the homologs of DUF4225<sup>18764</sup> are widespread in bacterial genomes, almost  
 264 exclusively belonging to the Pseudomonadota (formerly, Proteobacteria) phylum (**Fig. 6A** and  
 265 **Supplementary Dataset S6**). Interestingly, DUF4225 is found in polymorphic toxins containing  
 266 N-terminal domains associated with T6SS (e.g., PAAR, VgrG, and Hcp), type V secretion system  
 267 (e.g., Fil\_haemagg\_2 and DUF637 (61)), and others (e.g., SpvB (53), RHS\_repeat (16), and Sec  
 268 system signal peptides), although most of the homologs do not contain an identifiable N-terminal  
 269 domain fused to DUF4225 (**Fig. 6B** and **Supplementary Dataset S6**). Sometimes the association  
 270 of the DUF4225-containing protein with a specific secretion system can be inferred from adjacent  
 271 genes encoding known components of protein secretion systems, as is the case with  
 272 DUF4225<sup>18764</sup>, which is encoded downstream of *hcp1b*. Taken together, these results reveal that  
 273 DUF4225 is a toxin domain that is widespread in secreted polymorphic effectors.

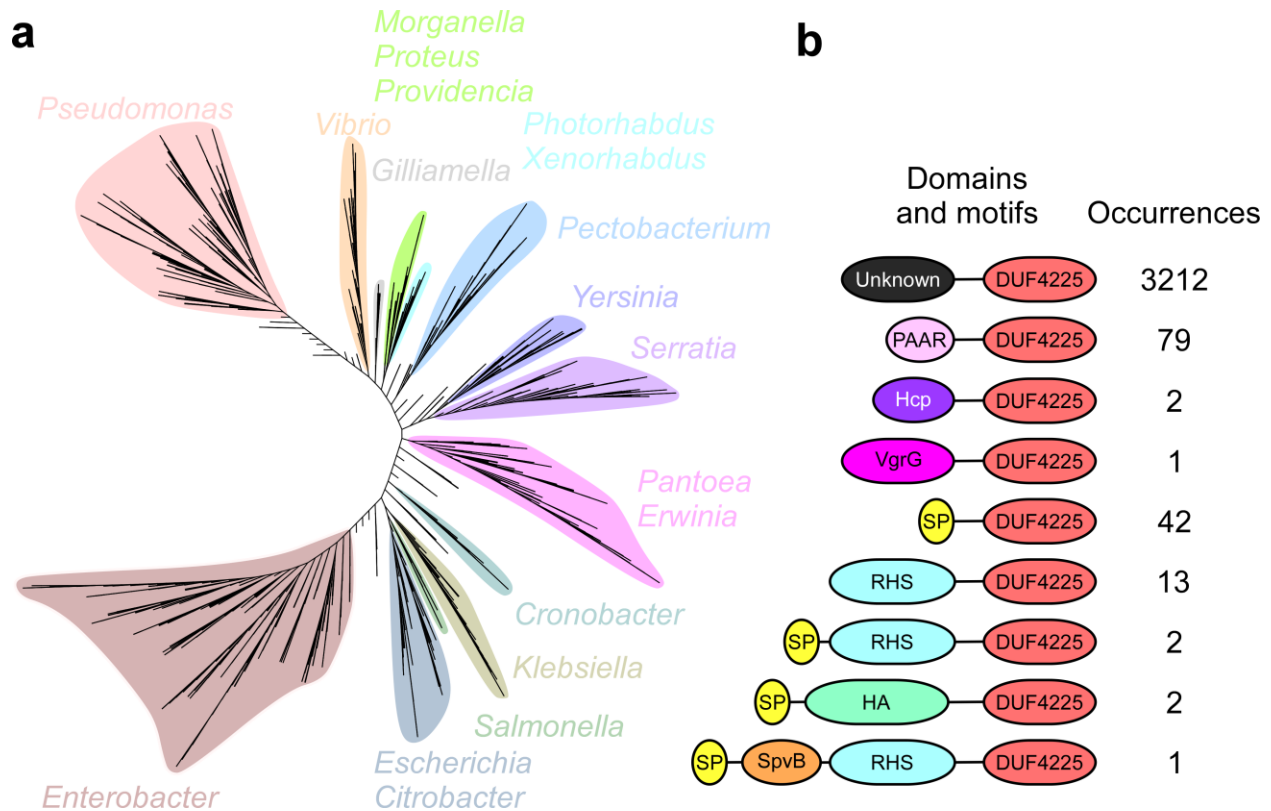

**Figure 6. DUF4225 is a widespread toxin domain. (a)** Phylogenetic distribution of bacteria encoding a DUF4225 homolog was based on the DNA sequences of *rpoB* coding for DNA-directed RNA polymerase subunit beta. The evolutionary history was inferred using the neighbor-joining method. **(b)** The domain architecture and the number of occurrences of DUF4225-containing proteins. SP, signal peptide; HA, Haemagg\_act + Fil\_haemagg\_2 + DUF637. Domain sizes are not to scale.

274

275 **Discussion**

276 *V. parahaemolyticus* is an emerging marine pathogen responsible for gastroenteritis in humans  
 277 (40) and for the economically devastating acute hepatopancreatic necrosis disease in shrimp (62).  
 278 Like many other vibrios, this species employs T6SSs to manipulate and outcompete its rivals (7,

279 11, 43, 45). Here, we performed a systematic analysis of all available RefSeq *V. parahaemolyticus*  
280 genomes, and we revealed the pan-genome repertoire of T6SS gene clusters, auxiliary modules,  
281 and the effectors therein.

282 We identified four T6SS gene cluster types in *V. parahaemolyticus* genomes. Two systems  
283 appear to be ancient and widespread, and two seem to have been more recently acquired. T6SS1  
284 and T6SS2, which were previously shown to mediate antibacterial activities (11, 43), are the most  
285 common systems in this species. T6SS2 is omnipresent; therefore, it is probably an ancient  
286 system that plays an important role in the *V. parahaemolyticus* life cycle. T6SS1, which is present  
287 in 68.3% of the genomes, is possibly also an ancient system; however, since T6SS1 appears to  
288 be absent from certain lineages (**Fig. 2**), we propose that it had been lost several times during  
289 the evolution of this species. This may be because T6SS1 serves a specialized purpose that is  
290 not beneficial for some strains. Indeed, we and others previously proposed that T6SS1 is present  
291 predominantly in pathogenic isolates of *V. parahaemolyticus* (41–43); therefore, it is plausible that  
292 non-pathogenic strains have lost this system, since it may only be required during colonization of  
293 a host. T6SS3 and T6SS4 are found in <3% of the genomes combined. Since DNA mobility genes  
294 flank these gene clusters, we propose that they have been recently acquired via HGT. This seems  
295 possible in light of the ability of vibrios to horizontally acquire large DNA fragments (46, 63, 64).  
296 The role and activity mediated by these two systems remains to be investigated. Nevertheless,  
297 we propose that T6SS3 mediates anti-eukaryotic activity, since it is similar to the previously  
298 reported T6SS3 in *V. proteolyticus* (50), and since we identified a putative effector within the  
299 cluster that lacks an identifiable potential immunity protein, suggesting that it does not mediate  
300 antibacterial activity. We also propose that T6SS4 mediates antibacterial activities, since we  
301 identified putative antibacterial effectors within it, which have a downstream adjacent gene that  
302 possibly encodes a cognate immunity protein (**Fig. 1b** and **Table 1**).

303 Our analysis also revealed diverse T6SS auxiliary modules encoding at least one of the secreted  
304 proteins, Hcp, VgrG, and PAAR. In most of these auxiliary modules, we found known or putative  
305 effectors that can diversify the toxic repertoires of this species' T6SSs. The identity of these genes  
306 as effectors is supported by their homology to known effectors, by their position downstream of  
307 genes encoding T6SS adaptors, by the presence of domains associated with T6SS-secreted  
308 proteins (e.g., MIX (36) and FIX (7)), and by the presence of homologs of their C-terminus in  
309 polymorphic toxins (**Table 1**). Interestingly, several effectors, identified within auxiliary modules,  
310 do not resemble previously studied toxins, and they may therefore employ novel mechanisms of  
311 action. Notably, although this was not directly addressed in this work, additional orphan effectors  
312 have been previously reported in *V. parahaemolyticus* genomes (7, 11, 42, 45); many are found  
313 next to DNA mobility genes, suggesting that they may also be horizontally shared within this  
314 species (42, 48). These orphan effectors further diversify the T6SS effector repertoire of this  
315 species.

316 In this work, we investigated the role of a gene encoding a DUF4225-containing protein; we  
317 showed that it is an antibacterial T6SS1 effector, and that its cognate immunity protein is encoded  
318 directly downstream. To the best of our knowledge, this is the first activity described for this  
319 domain of unknown function. Notably, DUF4225-encoding genes are common in Hcp-containing  
320 auxiliary modules, suggesting that they too are T6SS effectors. Our analysis also revealed that  
321 DUF4225 is widespread outside vibrios, where it is associated with T6SSs, as well as with other  
322 secretion systems that deliver polymorphic toxins.

323 We found that DUF4225 exerts its toxic activity in the bacterial periplasm. However, its  
324 mechanism of action and its cellular target remain unknown. Since its expression in the periplasm  
325 of *E. coli* cells led to cell lysis, we hypothesize that it affects the stability of the peptidoglycan or  
326 the membrane. Future biochemical and structural work will be required to address these open  
327 questions. Interestingly, we identified marine bacteria that resist intoxication by a DUF4225-

328 containing effector. Since we did not identify homologs of the cognate immunity protein encoded  
329 within the genomes of these resistant strains, we predict that they employ a yet-unknown non-  
330 immunity protein-mediated defense mechanism that counteracts the toxicity of this effector.

331 The effectorless surrogate T6SS platform constructed in this work is an important tool, allowing  
332 us to rapidly identify and investigate T6SS effectors encoded by any *V. parahaemolyticus* strain.  
333 Although we previously reported the construction of a similar surrogate system (11), the  
334 effectorless version reported here is superior: 1) the toxicity mediated by a putative effector can  
335 be tested against diverse prey strains, thus reducing the possibility of false negatives due to the  
336 lack of toxicity against a *V. parahaemolyticus* RIMD 2210633 prey (in hindsight, DUF4225<sup>18764</sup>  
337 would have been a false negative in the previous version of the surrogate platform); and 2) no  
338 endogenous effectors compete with the investigated putative effector for loading onto the  
339 secreted tube and spike, thus increasing the probability that it will be delivered by the surrogate  
340 system.

341 In conclusion, we present the first comprehensive analysis of the T6SS repertoire in the *V.*  
342 *parahaemolyticus* pan-genome. Our results reveal four T6SSs found within this species; they also  
343 indicate that mobile auxiliary modules probably contribute greatly to diversifying the T6SS effector  
344 repertoires in various strains. We also describe a role for the widespread DUF4225 as an  
345 antibacterial toxin domain, and we identify additional putative effectors that await investigation.

346

## 347 **Materials and Methods**

348 **Strains and Media:** For a complete list of strains used in this study, see [Supplementary Table](#)  
349 [S1](#). *E. coli* strains were grown in 2xYT broth (1.6% wt/vol tryptone, 1% wt/vol yeast extract, and  
350 0.5% wt/vol NaCl) or on Lysogeny Broth (LB) agar plates containing 1% wt/vol NaCl at 37°C, or  
351 at 30°C when harboring effector expression plasmids. The media were supplemented with  
352 chloramphenicol (10 µg/mL) or kanamycin (30 µg/mL) to maintain plasmids, and with 0.4% wt/vol  
353 glucose to repress protein expression from the arabinose-inducible promoter, *Pbad*. To induce  
354 expression from *Pbad*, L-arabinose was added to the media at 0.1-0.2% (wt/vol), as indicated.

355 *Vibrio parahaemolyticus*, *V. natriegens*, *V. coralliilyticus*, and *V. vulnificus* strains were grown in  
356 MLB media (LB media containing 3% wt/vol NaCl) or on marine minimal media (MMM) agar plates  
357 (1.5% wt/vol agar, 2% wt/vol NaCl, 0.4% wt/vol galactose, 5 mM MgSO<sub>4</sub>, 7 mM K<sub>2</sub>SO<sub>4</sub>, 77 mM  
358 K<sub>2</sub>HPO<sub>4</sub>, 35 mM KH<sub>2</sub>PO<sub>4</sub>, and 2 mM NH<sub>4</sub>Cl). *V. campbellii* were grown in MLB media and on MLB  
359 agar plates. *Aeromonas jandaei* were grown in LB media and on LB agar plates. When vibrios or  
360 *A. jandaei* contained a plasmid, the media were supplemented with kanamycin (250 µg/mL),  
361 chloramphenicol (10 µg/mL), or streptomycin (100 µg/mL) to maintain the plasmid. Bacteria were  
362 grown at 30°C. To induce expression from *Pbad*, L-arabinose was added to media at 0.05%  
363 (wt/vol).

364 **Plasmid construction:** For a complete list of plasmids used in this study, see [Supplementary](#)  
365 [Table S2](#). The DNA sequence of the Hcp1b auxiliary module from *V. parahaemolyticus* strain  
366 CFSAN018764 (positions 296 to 27 in NZ\_LHBG01000025.1) was synthesized by Twist  
367 Bioscience (USA). The entire module sequence or the sequences of genes within it were PCR  
368 amplified and then inserted into the multiple cloning site (MCS) of pBAD<sup>K</sup>/Myc-His, pPER5, or  
369 pBAD33.1<sup>F</sup>, in-frame with C-terminal Myc-His or FLAG tags, using the Gibson assembly method  
370 (65). For the expression of Imm4225<sup>18764</sup> in *V. natriegens*, the region spanning the *araC* gene to  
371 the *rrnT1* terminator was amplified from pBAD33.1<sup>F</sup> containing the gene in its MCS, and then  
372 inserted into the *NotI* restriction site of pCLTR plasmid using restriction-digestion and ligation.

373 Plasmids were introduced into *E. coli* using electroporation. Transformants were grown on agar  
374 plates supplemented with 0.4% wt/vol glucose to repress expression from the *Pbad* promoter

375 during the subcloning steps. Plasmids were introduced into vibrios and *A. jandaei* via conjugation.  
376 Trans-conjugants were grown on MLB agar plates for *V. campbellii*, LB agar plates for *A. jandaei*,  
377 or MMM agar plates for all other vibrios. Plates were supplemented with appropriate antibiotics to  
378 maintain the plasmids.

379 **Construction of deletion strains:** For in-frame deletions of *hcp1* in *V. corallilyticus*  
380 (VIC\_RS16330) or of *hcp1* in *V. campbellii* (A8140\_RS17660), 1 kb sequences upstream and  
381 downstream of each gene were subcloned into pDM4, a Cm<sup>r</sup>OriR6K suicide plasmid (66). Next,  
382 pDM4 constructs were introduced into the respective *Vibrio* strain via conjugation. Trans-  
383 conjugants were selected on MMM agar plates containing chloramphenicol (10 µg/mL). The  
384 resulting trans-conjugants were grown on MMM agar plates containing sucrose (15% wt/vol) for  
385 counter-selection and loss of the SacB-containing pDM4.

386 The VpT6SS1<sup>Surrogate</sup> strain and its  $\Delta$ *hcp1* derivative were generated by consecutive deletions or  
387 mutations of the relevant genes using previously reported pDM4 plasmids.

388 **Toxicity assays in *E. coli*:** To assess the toxicity mediated by DUF4225<sup>18764</sup>, pBAD<sup>K</sup>/Myc-His  
389 (for cytoplasmic expression) and pPER5 (for periplasmic expression fused to an N-terminal PelB  
390 signal peptide) plasmids, either empty or encoding DUF4225<sup>18764</sup> were transformed into *E. coli*  
391 BL21 (DE3). *E. coli* transformants were grown overnight in 2xYT media supplemented with  
392 kanamycin (30 µg/mL) under *Pbad* repressing conditions (0.4% wt/vol glucose). Overnight  
393 cultures were washed to remove residual glucose, and normalized to OD<sub>600</sub> = 0.01 in 2xYT media  
394 supplemented with kanamycin. Then, 200 µL of each bacterial culture were transferred into 96-  
395 well plates in quadruplicate. The cultures were grown at 37 °C with agitation (205 cpm) in a  
396 microplate reader (BioTek SYNERGY H1). After 2 h of growth, L-arabinose was added to each  
397 well at a final concentration of 0.1% (wt/vol), to induce protein expression. OD<sub>600</sub> readings were  
398 recorded every 10 min for 7 h.

399 To test the ability of Imm4225<sup>18764</sup> to antagonize the toxicity of DUF4225<sup>18764</sup>, a pBAD33.1<sup>F</sup>  
400 plasmid, either empty or encoding Imm4225<sup>18764</sup>, was co-transformed with a pPER5 plasmid,  
401 either empty or encoding DUF4225<sup>18764</sup>, into *E. coli* BL21 (DE3). The growth of these strains was  
402 determined as described above. Growth assays were performed at least four times with similar  
403 results. Results from a representative experiment are shown.

404 **Protein expression in *E. coli*:** To determine the expression of C-terminal Myc-His-tagged  
405 DUF4225<sup>18764</sup>, *E. coli* BL21 (DE3) bacteria carrying a single arabinose-inducible expression  
406 plasmid, either empty or encoding a cytoplasmic or a periplasmic DUF4225<sup>18764</sup>, or bacteria  
407 carrying two plasmids, one for expression of Imm4225<sup>18764</sup> and the other either empty or  
408 expressing the periplasmic version of DUF4225<sup>18764</sup>, were grown overnight in 2xYT media  
409 supplemented with the appropriate antibiotics to maintain plasmids, and glucose to repress  
410 expression from *Pbad*. The cultures were washed twice with fresh 2xYT medium to remove  
411 residual glucose, and then diluted 100-fold in 5 mL of fresh 2xYT medium supplemented with  
412 appropriate antibiotics and grown for 2 h at 37°C. To induce protein expression, 0.1% (wt/vol) L-  
413 arabinose was added to the media. After 4 additional hours of growth at 30°C, 1.0 OD<sub>600</sub> units of  
414 cells were pelleted and resuspended in 100 µL of (2X) Tris-Glycine SDS sample buffer (Novex,  
415 Life Sciences). Samples were boiled for 5 min, and cell lysates were resolved on Mini-  
416 PROTEAN TGX Stain-Free™ precast gels (Bio-Rad). For immunoblotting, α-Myc antibodies  
417 (Santa Cruz Biotechnology, 9E10, mouse mAb; sc-40) were used at 1:1,000 dilution. Protein  
418 signals were visualized in a Fusion FX6 imaging system (Vilber Lourmat) using enhanced  
419 chemiluminescence (ECL) reagents. Experiments were performed at least three times with similar  
420 results; the results from representative experiments are shown.

421 **Bacterial competition assays:** Bacterial competition assays were performed as previously  
422 described (37), with minor changes. Briefly, cultures of the indicated attacker and prey strains

423 were grown overnight. Bacterial cultures were then normalized to  $OD_{600} = 0.5$  and mixed at a 10:1  
424 (attacker: prey) ratio. The mixtures were spotted (25  $\mu$ L) on MLB agar plates supplemented with  
425 0.05% (wt/vol) L-arabinose, and incubated for 4 h at 30°C. Colony forming units (CFU) of the prey  
426 strains were determined at the 0 and 4-hour timepoints. The experiments were performed at least  
427 three times with similar results. Results from a representative experiment are shown.

428 **Fluorescence microscopy:** Cell morphology and membrane permeability during the expression  
429 of DUF4225<sup>18764</sup> in *E. coli* was assessed as previously described (37). Briefly, overnight-grown  
430 *E. coli* MG1655 cells carrying a pPER5 plasmid, either empty or encoding DUF4225<sup>18764</sup>, were  
431 diluted 100-fold into 5 mL of fresh LB media supplemented with kanamycin and 0.2% (wt/vol)  
432 glucose. Bacterial cultures were grown for 2 h at 37°C, and then cells were washed with 0.15 M  
433 NaCl to remove residual glucose. Bacterial cultures were normalized to  $OD_{600} = 0.5$  in 0.15 M  
434 NaCl solution. To visualize the cell wall of *E. coli*, 20  $\mu$ L of bacterial cultures were incubated with  
435 Wheat Germ Agglutinin Alexa Fluor 488 Conjugate (Biotium; Catalogue no. 29022–1) at a final  
436 concentration of 0.1 mg/mL, and incubated for 10 min at room temperature (RT). Next, 1  $\mu$ L was  
437 spotted on LB agarose pads (1% wt/vol agarose supplemented with 0.2% wt/vol L-arabinose)  
438 onto which 1  $\mu$ L of the membrane-impermeable DNA dye, propidium iodide (PI; 1 mg/mL; Sigma-  
439 Aldrich) had been pre-applied. After the spots had dried (1–2 min at RT), the agarose pads were  
440 mounted, facing down, on 35 mm glass bottom CELLview™ cell culture dishes (Greiner). Cells  
441 were then imaged every 5 min for 4 h under a fluorescence microscope, as detailed below. The  
442 stage chamber (Okolab) temperature was set to 37°C. Bacteria were imaged in a Nikon Eclipse  
443 Ti2-E inverted motorized microscope equipped with a CFI PLAN apochromat DM 100X oil lambda  
444 PH-3 (NA, 1.45) objective lens, a Lumencor SOLA SE II 395 light source, and ET-EGFP (#49002,  
445 used to visualize the Alexa Fluor 488 signal), and an RFP filter cube (#49005, used to visualize  
446 the PI signal) filter sets. Images were acquired using a DS-QI2 Mono cooled digital microscope  
447 camera (16 MP) and were post-processed using Fiji ImageJ suite. The experiments were  
448 performed three times. Results from a representative experiment are shown.

449 **VgrG1 secretion assays:** *V. parahaemolyticus* VpT6SS1<sup>Surrogate</sup> and its  $\Delta hcp1$  derivative strain  
450 were grown overnight at 30°C in MLB media. Bacterial cultures were normalized to  $OD_{600} = 0.18$   
451 in 5 mL of MLB media, and after 5 h of incubation at 30°C with agitation (220 rpm), expression  
452 fractions (cells) and secretion fractions (media) were collected and processed as previously  
453 described (37).

454 **Identifying T6SS gene clusters in *V. parahaemolyticus*:** A local database containing the  
455 RefSeq bacterial nucleotide and protein sequences was generated (last updated on June 11,  
456 2022). *V. parahaemolyticus* genomes were retrieved from the local database and OrthoANI was  
457 performed as described previously (11, 67). Two genomes (assembly accessions  
458 GCF\_000591535.1 and GCF\_003337295.1) with OrthoANI values <95% were removed from the  
459 dataset.

460 The presence of T6SS gene clusters in *V. parahaemolyticus* genomes was determined by  
461 following the two-step procedure described below. In the first step, BLASTN (68) was employed  
462 to align *V. parahaemolyticus* nucleotide sequences against the nucleotide sequences of  
463 representative T6SS clusters ([Figure 1](#) and [Supplementary Dataset S3](#)). The expect value  
464 threshold was set to  $10^{-12}$  and the minimal alignment length was 500 bp. The results were then  
465 sorted by their nucleotide accession numbers and bit score values (from largest to smallest), and  
466 the best alignments for each nucleotide accession number were saved. This step resulted in a list  
467 of *V. parahaemolyticus* nucleotide accession numbers and their best alignments to the  
468 representative T6SS gene clusters, including the positions of the alignments. In the second step,  
469 a two-dimensional matrix was generated for each T6SS gene cluster in which rows represented  
470 the *V. parahaemolyticus* genomes and columns represented the coordinates of the specific T6SS  
471 gene cluster. The matrices were then filled in with the percent identity values, based on the

472 positions of the alignments. Finally, the overall coverage was calculated for each T6SS gene  
473 cluster in each genome. *V. parahaemolyticus* genomes with at least 70% overall coverage of  
474 T6SS gene cluster were regarded as containing that T6SS gene cluster ([Supplementary Dataset](#)  
475 [S3](#)).

476 **Identifying T6SS auxiliary modules:** RPS-BLAST (69) was employed to identify proteins  
477 containing Hcp (COG3157), PAAR (DUF4150, PAAR\_motif, PAAR\_1, PAAR\_2, PAAR\_3,  
478 PAAR\_4, PAAR\_5, PAAR\_RHS, PAAR\_CT\_1, PAAR\_CT\_2), and VgrG (COG3501) domains  
479 that were retrieved from the Conserved Domain Database (70), in *V. parahaemolyticus* genomes.  
480 Protein accessions located at the ends of contigs were removed. T6SS auxiliary modules were  
481 manually identified, based on the distance from the T6SS gene clusters, the genomic architecture,  
482 and the conserved domains in neighboring genes ([Supplementary Dataset S4](#)).

483 **Identifying DUF4225 homologs with domain and neighborhood analysis:** The Position-  
484 Specific Scoring Matrix (PSSM) of the DUF4225 domain was reconstructed using amino acids  
485 105-243 of DUF4225<sup>18764</sup> from *V. parahaemolyticus* strain CFSAN018764 (WP\_065788326.1).  
486 Five iterations of PSI-BLAST were performed against the reference protein database (a maximum  
487 of 500 hits with an expect value threshold of  $10^{-6}$  and a query coverage of 70% were used in each  
488 iteration). RPS-BLAST was then performed to identify DUF4225-containing proteins. The results  
489 were filtered using an expect value threshold of  $10^{-8}$  and a minimal coverage of 70%. The genomic  
490 neighborhoods of DUF4225-containing proteins were analyzed as described previously (11, 45).  
491 Duplicated protein accessions appearing in the same genome in more than one genomic  
492 accession were removed if the same downstream protein existed at the same distance  
493 ([Supplementary Dataset S6](#)).

494 **Constructing phylogenetic trees:** The nucleotide sequences of *rpoB* coding for DNA-directed  
495 RNA polymerase subunit beta were retrieved from the local RefSeq database. Partial and  
496 pseudogene sequences were not included in the analyses. In the case of bacterial genomes  
497 encoding DUF4225 homologs, the *rpoB* sequences were first clustered using CD-HIT to remove  
498 identical sequences (100% identity threshold). Phylogenetic analyses of bacterial genomes were  
499 conducted using the MAFFT 7 server ([mafft.cbrc.jp/alignment/server/](http://mafft.cbrc.jp/alignment/server/)). The *rpoB* sequences were  
500 aligned using MAFFT v7 FFT-NS-2 (71, 72). In the case of *V. parahaemolyticus* genomes, the  
501 evolutionary history was inferred using the neighbor-joining method (73) with the Jukes-Cantor  
502 substitution model (JC69). The analysis included 1,694 nucleotide sequences and 3,964  
503 conserved sites. In the case of bacterial genomes encoding DUF4225, the evolutionary history  
504 was inferred using the average linkage (UPGMA) method and included 2,816 nucleotide  
505 sequences.

506 The protein accessions of TssB and Hcp from *V. parahaemolyticus* genomes were retrieved and  
507 unique sequences were aligned using CLUSTAL Omega (74). The evolutionary history was  
508 inferred using the Neighbor-Joining method (73). The analysis of TssB included 42 amino acid  
509 sequences and 166 conserved sites. The analysis of Hcp included 27 amino acid sequences and  
510 133 conserved sites. Evolutionary analyses in both cases were conducted in MEGA X (75).

511 **Identifying effectors in T6SS gene clusters and auxiliary modules:** The presence of effectors  
512 in T6SS gene clusters and auxiliary modules was determined by homology to previously studied  
513 effectors in *V. parahaemolyticus*, by the location within auxiliary modules downstream of secreted  
514 core components (i.e., Hcp, VgrG, or PAAR) or of known T6SS adaptor-encoding genes (i.e.,  
515 DUF4123, DUF1795, or DUF2169), and by the presence of potential C-terminal toxin domains  
516 identified using NCBI's Conserved Domain Database (76). The presence of homologs of C-  
517 terminal toxin domains in other polymorphic toxin classes was determined using Jackhmmer (77).

518



## 519 **Acknowledgments**

520 This project received funding from the European Research Council under the European Union's  
521 Horizon 2020 research and innovation program (grant agreement no. 714224 to D Salomon), and  
522 from the Israel Science Foundation (grant no. 920/17 to D Salomon, and grant no. 1362/21 to D  
523 Salomon and E Bosis). CM Fridman was supported by scholarships from the Clore Israel  
524 Foundation and from the Manna Center Program in Food Safety and Security at Tel Aviv  
525 University, as well as by a scholarship for outstanding doctoral students from the Orthodox  
526 community from the Council for Higher Education. We thank Hila Saar, Nikol Dvir, and Nely Altshul  
527 for their excellent technical assistance, and members of the Salomon and Bosis laboratories for  
528 helpful discussions and suggestions.

529

## 530 **Author Contributions**

531 B Jana: conceptualization, investigation, methodology, and writing—review and editing.

532 K Keppel: investigation and methodology

533 CM Fridman: investigation and methodology

534 E Bosis: conceptualization, funding acquisition, investigation, methodology, and writing—  
535 original draft.

536 D Salomon: conceptualization, supervision, funding acquisition, investigation, methodology, and  
537 writing—original draft.

538

## 539 **Conflict of Interest**

540 The authors declare that they have no conflict of interest.

541

## 542 **References**

- 543 1. Klein TA, Ahmad S, Whitney JC. 2020. Contact-dependent interbacterial antagonism  
544 mediated by protein secretion machines. *Trends Microbiol.* Elsevier Ltd  
545 <https://doi.org/10.1016/j.tim.2020.01.003>.
- 546 2. Hood RD, Singh P, Hsu FS, Güvener T, Carl MA, Trinidad RRS, Silverman JM, Ohlson  
547 BB, Hicks KG, Plemel RL, Li M, Schwarz S, Wang WY, Merz AJ, Goodlett DR, Mougous  
548 JD. 2010. A type VI secretion system of *Pseudomonas aeruginosa* targets a toxin to  
549 bacteria. *Cell Host Microbe* 7:25–37.
- 550 3. Boyer F, Fichant G, Berthod J, Vandenbrouck Y, Attree I. 2009. Dissecting the bacterial  
551 type VI secretion system by a genome wide in silico analysis: What can be learned from  
552 available microbial genomic resources? *BMC Genomics* 10:104.
- 553 4. Bingle LE, Bailey CM, Pallen MJ. 2008. Type VI secretion: a beginner's guide. *Curr Opin*  
554 *Microbiol* 11:3–8.
- 555 5. Wang J, Brackmann M, Castaño-Díez D, Kudryashev M, Goldie KN, Maier T, Stahlberg  
556 H, Basler M. 2017. Cryo-EM structure of the extended type VI secretion system sheath-  
557 tube complex. *Nat Microbiol* 2:1507–1512.
- 558 6. Shneider MM, Buth SA, Ho BT, Basler M, Mekalanos JJ, Leiman PG. 2013. PAAR-repeat  
559 proteins sharpen and diversify the type VI secretion system spike. *Nature* 500:350–353.

- 560 7. Jana B, Fridman CM, Bosis E, Salomon D. 2019. A modular effector with a DNase  
561 domain and a marker for T6SS substrates. *Nat Commun* 10:3595.
- 562 8. Crisan C V., Chande AT, Williams K, Raghuram V, Rishishwar L, Steinbach G, Watve  
563 SS, Yunker P, Jordan IK, Hammer BK. 2019. Analysis of *Vibrio cholerae* genomes  
564 identifies new type VI secretion system gene clusters. *Genome Biol* 20.
- 565 9. Hachani A, Allsopp LP, Oduko Y, Filloux A. 2014. The VgrG proteins are “à la carte”  
566 delivery systems for bacterial type VI effectors. *J Biol Chem* 289:17872–84.
- 567 10. Russell AB, Leroux M, Hathazi K, Agnello DM, Ishikawa T, Wiggins PA, Wai SN,  
568 Mougous JD. 2013. Diverse type VI secretion phospholipases are functionally plastic  
569 antibacterial effectors. *Nature* 496:508–512.
- 570 11. Fridman CM, Keppel K, Gerlic M, Bosis E, Salomon D. 2020. A comparative genomics  
571 methodology reveals a widespread family of membrane-disrupting T6SS effectors. *Nat*  
572 *Commun* 11:1085.
- 573 12. Russell AB, Singh P, Brittnacher M, Bui NK, Hood RD, Carl MA, Agnello DM, Schwarz S,  
574 Goodlett DR, Vollmer W, Mougous JD. 2012. A widespread bacterial type VI secretion  
575 effector superfamily identified using a heuristic approach. *Cell Host Microbe* 11:538–549.
- 576 13. Jana B, Salomon D. 2019. Type VI secretion system: a modular toolkit for bacterial  
577 dominance. *Future Microbiol* 14:fmb-2019-0194.
- 578 14. Basler M, Pilhofer M, Henderson GP, Jensen GJ, Mekalanos JJ. 2012. Type VI secretion  
579 requires a dynamic contractile phage tail-like structure. *Nature* 483:182–6.
- 580 15. Ma LS, Hachani A, Lin JS, Filloux A, Lai EM. 2014. *Agrobacterium tumefaciens* deploys a  
581 superfamily of type VI secretion DNase effectors as weapons for interbacterial  
582 competition in planta. *Cell Host Microbe* 16:94–104.
- 583 16. Koskiniemi S, Lamoureux JG, Nikolakakis KC, t’Kint de Roodenbeke C, Kaplan MD, Low  
584 DA, Hayes CS. 2013. Rhs proteins from diverse bacteria mediate intercellular  
585 competition. *Proc Natl Acad Sci U S A* 110:7032–7.
- 586 17. Pissaridou P, Allsopp LP, Wettstadt S, Howard SA, Mavridou DAI, Filloux A. 2018. The  
587 *Pseudomonas aeruginosa* T6SS-VgrG1b spike is topped by a PAAR protein eliciting DNA  
588 damage to bacterial competitors. *Proc Natl Acad Sci U S A* 115:12519–12524.
- 589 18. Alcoforado Diniz J, Coulthurst SJ. 2015. Intraspecies competition in *Serratia marcescens*  
590 is mediated by type VI-secreted Rhs effectors and a conserved effector-associated  
591 accessory protein. *J Bacteriol* 197:2350–60.
- 592 19. Ma J, Pan Z, Huang J, Sun M, Lu C, Yao H. 2017. The Hcp proteins fused with diverse  
593 extended-toxin domains represent a novel pattern of antibacterial effectors in type VI  
594 secretion systems. *Virulence* 8:1189–1202.
- 595 20. LaCourse KD, Peterson SB, Kulasekara HD, Radey MC, Kim J, Mougous JD. 2018.  
596 Conditional toxicity and synergy drive diversity among antibacterial effectors. *Nat*  
597 *Microbiol* 3:440–446.
- 598 21. Mariano G, Trunk K, Williams DJ, Monlezun L, Strahl H, Pitt SJ, Coulthurst SJ. 2019. A  
599 family of Type VI secretion system effector proteins that form ion-selective pores. *Nat*  
600 *Commun* 10:1–15.
- 601 22. Miyata ST, Unterweger D, Rudko SP, Pukatzki S. 2013. Dual expression profile of type VI  
602 secretion system immunity genes protects pandemic *Vibrio cholerae*. *PLoS Pathog* 9:1–  
603 18.

- 604 23. Whitney JC, Chou S, Russell AB, Biboy J, Gardiner TE, Ferrin MA, Brittnacher M,  
605 Vollmer W, Mougous JD. 2013. Identification, structure, and function of a novel type VI  
606 secretion peptidoglycan glycoside hydrolase effector-immunity pair. *J Biol Chem*  
607 288:26616–24.
- 608 24. Sibinelli-Sousa S, Hespanhol JT, Nicastro GG, Matsuyama BY, Mesnage S, Patel A, de  
609 Souza RF, Guzzo CR, Bayer-Santos E. 2020. A family of T6SS antibacterial effectors  
610 related to I,d-transpeptidases targets the peptidoglycan. *Cell Rep* 31:107813.
- 611 25. Whitney JC, Quentin D, Sawai S, LeRoux M, Harding BN, Ledvina HE, Tran BQ,  
612 Robinson H, Goo YA, Goodlett DR, Raunser S, Mougous JD. 2015. An interbacterial  
613 NAD(P)+ glycohydrolase toxin requires elongation factor Tu for delivery to target cells.  
614 *Cell* 163:607–619.
- 615 26. Tang JY, Bullen NP, Ahmad S, Whitney JC. 2018. Diverse NADase effector families  
616 mediate interbacterial antagonism via the type VI secretion system. *J Biol Chem*  
617 293:1504–1514.
- 618 27. Ting S-YY, Bosch DE, Mangiameli SM, Radey MC, Huang S, Park Y-JJ, Kelly KA, Filip  
619 SK, Goo YA, Eng JK, Allaire M, Veessler D, Wiggins PA, Peterson SB, Mougous JD.  
620 2018. Bifunctional immunity proteins protect bacteria against FtsZ-targeting ADP-  
621 Ribosylating toxins. *Cell* 175:1380-1392.e14.
- 622 28. Jurėnas D, Payelleville A, Roghanian M, Turnbull KJ, Givaudan A, Brillard J, Hauryliuk V,  
623 Cascales E. 2021. Photorhabdus antibacterial Rhs polymorphic toxin inhibits translation  
624 through ADP-ribosylation of 23S ribosomal RNA. *Nucleic Acids Res* 49.
- 625 29. Nolan LM, Cain AK, Clamens T, Furniss RCD, Manoli E, Sainz-Polo MA, Dougan G,  
626 Albesa-Jové D, Parkhill J, Mavridou DAI, Filloux A. 2021. Identification of Tse8 as a type  
627 VI secretion system toxin from *Pseudomonas aeruginosa* that targets the bacterial  
628 transamidosome to inhibit protein synthesis in prey cells. *Nat Microbiol* 6.
- 629 30. de Moraes MH, Hsu F, Huang D, Bosch DE, Zeng J, Radey MC, Simon N, Ledvina HE,  
630 Frick JP, Wiggins PA, Peterson SB, Mougous JD. 2021. An interbacterial dna deaminase  
631 toxin directly mutagenizes surviving target populations. *Elife* 10.
- 632 31. Ahmad S, Wang B, Walker MD, Tran HKR, Stogios PJ, Savchenko A, Grant RA,  
633 McArthur AG, Laub MT, Whitney JC. 2019. An interbacterial toxin inhibits target cell  
634 growth by synthesizing (p)ppApp. *Nature* 575.
- 635 32. Ruhe ZC, Low DA, Hayes CS. 2020. Polymorphic toxins and their immunity proteins:  
636 Diversity, evolution, and mechanisms of delivery. *Annu Rev Microbiol* 74:497–520.
- 637 33. Lien YW, Lai EM. 2017. Type VI secretion effectors: Methodologies and biology. *Front*  
638 *Cell Infect Microbiol* <https://doi.org/10.3389/fcimb.2017.00254>.
- 639 34. Liang X, Moore R, Wilton M, Wong MJQ, Lam L, Dong TG. 2015. Identification of  
640 divergent type VI secretion effectors using a conserved chaperone domain. *Proc Natl*  
641 *Acad Sci* 112:9106–9111.
- 642 35. Dong TG, Ho BT, Yoder-Himes DR, Mekalanos JJ. 2013. Identification of T6SS-  
643 dependent effector and immunity proteins by Tn-seq in *Vibrio cholerae*. *Proc Natl Acad*  
644 *Sci* 110:2623–2628.
- 645 36. Salomon D, Kinch LN, Trudgian DC, Guo X, Klimko JA, Grishin N V., Mirzaei H, Orth K.  
646 2014. Marker for type VI secretion system effectors. *Proc Natl Acad Sci* 111:9271–9276.
- 647 37. Dar Y, Jana B, Bosis E, Salomon D. 2021. A binary effector module secreted by a type VI

- 648 secretion system. EMBO Rep e53981.
- 649 38. Liang X, Pei TT, Li H, Zheng HY, Luo H, Cui Y, Tang MX, Zhao YJ, Xu P, Dong T. 2021.  
650 VgrG-dependent effectors and chaperones modulate the assembly of the type VI  
651 secretion system. PLoS Pathog 17:e1010116.
- 652 39. Manera K, Kamal F, Burkinshaw B, Dong TG. 2021. Essential functions of chaperones  
653 and adaptors of protein secretion systems in Gram-negative bacteria. FEBS J  
654 <https://doi.org/10.1111/FEBS.16056>.
- 655 40. Baker-Austin C, Oliver JD, Alam M, Ali A, Waldor MK, Qadri F, Martinez-Urtaza J. 2018.  
656 *Vibrio* spp. infections. Nat Rev Dis Prim 4:1–19.
- 657 41. Yu Y, Yang H, Li J, Zhang P, Wu B, Zhu B, Zhang Y, Fang W. 2012. Putative type VI  
658 secretion systems of *Vibrio parahaemolyticus* contribute to adhesion to cultured cell  
659 monolayers. Arch Microbiol 194:827–835.
- 660 42. Li P, Kinch LN, Ray A, Dalia AB, Cong Q, Nunan LM, Camilli A, Grishin N V, Salomon D,  
661 Orth K. 2017. Acute hepatopancreatic necrosis disease-causing *Vibrio parahaemolyticus*  
662 strains maintain an antibacterial type VI secretion system with versatile effector  
663 repertoires. Appl Environ Microbiol 83:e00737-17.
- 664 43. Salomon D, Gonzalez H, Updegraff BL, Orth K. 2013. *Vibrio parahaemolyticus* Type VI  
665 secretion system 1 is activated in marine conditions to target bacteria, and is differentially  
666 regulated from system 2. PLoS One 8:e61086.
- 667 44. Metzger LC, Matthey N, Stoudmann C, Collas EJ, Blokesch M. 2019. Ecological  
668 implications of gene regulation by TfoX and TfoY among diverse *Vibrio* species. Environ  
669 Microbiol 21:2231–2247.
- 670 45. Dar Y, Salomon D, Bosis E. 2018. The antibacterial and anti-eukaryotic Type VI secretion  
671 system MIX-effector repertoire in Vibrionaceae. Mar Drugs 16:433.
- 672 46. Le Roux F, Blokesch M. 2018. Eco-evolutionary dynamics linked to horizontal gene  
673 transfer in vibrios. Annu Rev Microbiol 72:annurev-micro-090817-062148.
- 674 47. Sun Y, Bernardy EE, Hammer BK, Miyashiro T. 2013. Competence and natural  
675 transformation in vibrios. Mol Microbiol 89.
- 676 48. Salomon D, Klimko JA, Trudgian DC, Kinch LN, Grishin N V., Mirzaei H, Orth K. 2015.  
677 Type VI secretion system toxins horizontally shared between marine bacteria. PLoS  
678 Pathog 11:1–20.
- 679 49. Thomas J, Watve SS, Ratcliff WC, Hammer BK. 2017. Horizontal gene transfer of  
680 functional type VI killing genes by natural transformation. MBio 8:1–11.
- 681 50. Ray A, Schwartz N, Souza Santos M, Zhang J, Orth K, Salomon D, de Souza Santos M,  
682 Zhang J, Orth K, Salomon D. 2017. Type VI secretion system MIX-effectors carry both  
683 antibacterial and anti-eukaryotic activities. EMBO Rep 18:e201744226.
- 684 51. Unterweger D, Kostiuk B, Pukatzki S. 2017. Adaptor proteins of type VI secretion system  
685 effectors. Trends Microbiol 25:8–10.
- 686 52. Käll L, Krogh A, Sonnhammer EL. 2004. A combined transmembrane topology and signal  
687 peptide prediction method. J Mol Biol 338:1027–1036.
- 688 53. Zhang D, de Souza RF, Anantharaman V, Iyer LM, Aravind L. 2012. Polymorphic toxin  
689 systems: Comprehensive characterization of trafficking modes, processing, mechanisms  
690 of action, immunity and ecology using comparative genomics. Biol Direct 7:18.

- 691 54. Lopez J, Le N-H, Moon KH, Salomon D, Bosis E, Feldman MF. 2021. Formylglycine-  
692 generating enzyme-like proteins constitute a novel family of widespread type VI secretion  
693 system immunity proteins. *J Bacteriol* 203.
- 694 55. Jana B, Keppel K, Salomon D. 2021. Engineering a customizable antibacterial T6SS-  
695 based platform in *Vibrio natriegens*. *EMBO Rep* 22:e53681.
- 696 56. Salomon D, Klimko JA, Orth K. 2014. H-NS regulates the *Vibrio parahaemolyticus* type VI  
697 secretion system 1. *Microbiol (United Kingdom)* 160:1867–1873.
- 698 57. Russell AB, Hood RD, Bui NK, Leroux M, Vollmer W, Mougous JD. 2011. Type VI  
699 secretion delivers bacteriolytic effectors to target cells. *Nature* 475:343–349.
- 700 58. Ringel PD, Hu D, Basler M. 2017. The role of type VI secretion system effectors in target  
701 cell lysis and subsequent horizontal gene transfer. *Cell Rep* 21:3927–3940.
- 702 59. Hersch SJ, Watanabe N, Stietz MS, Manera K, Kamal F, Burkinshaw B, Lam L, Pun A, Li  
703 M, Savchenko A, Dong TG. 2020. Envelope stress responses defend against type six  
704 secretion system attacks independently of immunity proteins. *Nat Microbiol* 5:706–714.
- 705 60. Hersch SJ, Manera K, Dong TG. 2020. Defending against the Type Six Secretion  
706 System: beyond Immunity Genes. *Cell Rep* 33:108259.
- 707 61. Aoki SK, Diner EJ, de Roodenbeke C t'Kint, Burgess BR, Poole SJ, Braaten BA, Jones  
708 AM, Webb JS, Hayes CS, Cotter PA, Low DA. 2010. A widespread family of polymorphic  
709 contact-dependent toxin delivery systems in bacteria. *Nature* 468:439–442.
- 710 62. Tran L, Nunan L, Redman R, Mohny L, Pantoja C, Fitzsimmons K, Lightner D. 2013.  
711 Determination of the infectious nature of the agent of acute hepatopancreatic necrosis  
712 syndrome affecting penaeid shrimp. *Dis Aquat Organ* 105:45–55.
- 713 63. Borgeaud S, Metzger LC, Scignari T, Blokesch M. 2015. The type VI secretion system of  
714 *Vibrio cholerae* fosters horizontal gene transfer. *Science* 347:63–7.
- 715 64. Matthey N, Stutzmann S, Stoudmann C, Guex N, Iseli C, Blokesch M. 2019. Neighbor  
716 predation linked to natural competence fosters the transfer of large genomic regions in  
717 *vibrio cholerae*. *Elife* 8.
- 718 65. Gibson DG, Young L, Chuang RY, Venter JC, Hutchison CA, Smith HO. 2009. Enzymatic  
719 assembly of DNA molecules up to several hundred kilobases. *Nat Methods* 6:343–345.
- 720 66. O'Toole R, Milton DL, Wolf-Watz H. 1996. Chemotactic motility is required for invasion of  
721 the host by the fish pathogen *Vibrio anguillarum*. *Mol Microbiol* 19:625–637.
- 722 67. Lee I, Ouk Kim Y, Park S-C, Chun J. 2016. OrthoANI: An improved algorithm and  
723 software for calculating average nucleotide identity. *Int J Syst Evol Microbiol* 66:1100–  
724 1103.
- 725 68. Camacho C, Coulouris G, Avagyan V, Ma N, Papadopoulos J, Bealer K, Madden TL.  
726 2009. BLAST+: Architecture and applications. *BMC Bioinformatics* 10.
- 727 69. Altschul SF, Madden TL, Schäffer AA, Zhang J, Zhang Z, Miller W, Lipman DJ. 1997.  
728 Gapped BLAST and PSI-BLAST: a new generation of protein database search programs.  
729 *Nucleic Acids Res* 25:3389–402.
- 730 70. Marchler-Bauer A, Bo Y, Han L, He J, Lanczycki CJ, Lu S, Chitsaz F, Derbyshire MK,  
731 Geer RC, Gonzales NR, Gwadz M, Hurwitz DI, Lu F, Marchler GH, Song JS, Thanki N,  
732 Wang Z, Yamashita RA, Zhang D, Zheng C, Geer LY, Bryant SH. 2017. CDD/SPARCLE:  
733 functional classification of proteins via subfamily domain architectures. *Nucleic Acids Res*

- 734 45:D200–D203.
- 735 71. Katoh K, Misawa K, Kuma K, Miyata T. 2002. MAFFT: a novel method for rapid multiple  
736 sequence alignment based on fast Fourier transform. *Nucleic Acids Res* 30:3059–66.
- 737 72. Katoh K, Rozewicki J, Yamada KD. 2018. MAFFT online service: Multiple sequence  
738 alignment, interactive sequence choice and visualization. *Brief Bioinform* 20:1160–1166.
- 739 73. Saitou N, Nei M. 1987. The neighbor-joining method: a new method for reconstructing  
740 phylogenetic trees. *Mol Biol Evol* 4:406–425.
- 741 74. Sievers F, Wilm A, Dineen D, Gibson TJ, Karplus K, Li W, Lopez R, McWilliam H,  
742 Remmert M, Söding J, Thompson JD, Higgins DG. 2011. Fast, scalable generation of  
743 high-quality protein multiple sequence alignments using Clustal Omega. *Mol Syst Biol*  
744 7:539.
- 745 75. Kumar S, Stecher G, Li M, Knyaz C, Tamura K. 2018. MEGA X: Molecular evolutionary  
746 genetics analysis across computing platforms. *Mol Biol Evol* 35:1547–1549.
- 747 76. Marchler-Bauer A, Anderson JB, Derbyshire MK, DeWeese-Scott C, Gonzales NR,  
748 Gwadz M, Hao L, He S, Hurwitz DI, Jackson JD, Ke Z, Krylov D, Lanczycki CJ, Liebert  
749 CA, Liu C, Lu F, Lu S, Marchler GH, Mullokandov M, Song JS, Thanki N, Yamashita RA,  
750 Yin JJ, Zhang D, Bryant SH. 2007. CDD: a conserved domain database for interactive  
751 domain family analysis. *Nucleic Acids Res* 35:D237-40.
- 752 77. Zimmermann L, Stephens A, Nam S-Z, Rau D, Kübler J, Lozajic M, Gabler F, Söding J,  
753 Lupas AN, Alva V. 2018. A completely reimplemented MPI bioinformatics toolkit with a  
754 new HHpred server at its core. *J Mol Biol* 430:2237–2243.
- 755
